# Supplementary material
Source: HighWire-hosted journal article supplement (https://erj.ersjournals.com/content/60/1/2101694)
Supplement: inline-supplementary-material-1 [file inline-supplementary-material-1.pdf]

**SUPPLEMENTARY MATERIAL**

**Contents**

**Study group ..... 2**

**Inclusion and exclusion criteria ..... 5**

**Blinding ..... 8**

**Sensitivity analysis under alternative assumptions about the missing data ..... 8**

**Figure S1. Change in PVR from baseline by final maintenance dose. .... 9**

**Table S1. Randomised controlled trial data on the use of medical therapies in  
patients with chronic thromboembolic pulmonary hypertension. .... 10**

**Table S2. Sensitivity analysis of PVR. .... 11**

**Table S3. Changes from baseline in SBP, DBP, and PR..... 12**

## Study group

Takeshi Ogo, Division of Advanced Medical Research in Pulmonary Hypertension,  
Division of Pulmonary Circulation, Department of Cardiovascular Medicine, National  
Cerebral and Cardiovascular Centre

Hiroto Shimokawahara, Department of Cardiology, National Hospital Organization  
Okayama Medical Centre

Hideyuki Kinoshita, Department of Community Medicine Supporting System, Kyoto  
University Graduate School of Medicine

Seiichiro Sakao, Department of Respiriology, Graduate School of Medicine, Chiba  
University

Kohtaro Abe, Departments of Cardiovascular Medicine, Kyushu University Graduate  
School of Medical Sciences

Satoaki Matoba, Department of Cardiovascular Medicine, Graduate School of Medical  
Science, Kyoto Prefectural University of Medicine

Hirohiko Motoki, Department of Cardiology, Shinshu University School of Medicine

Noriaki Takama, Department of Cardiovascular Medicine, Gunma University Graduate  
School of Medicine

Junya Ako, Department of Cardiovascular Medicine, Kitasato University

Yasuhiro Ikeda, Department of Cardiology, Yamaguchi Prefectural Grand Medical  
Center

Shuji Joho, Second Department of Internal Medicine, University of Toyama

Hisataka Maki, Department of Cardiology, The University of Tokyo Hospital

Takahiro Saeki, Cardiovascular Medicine, National Hospital Organization Kanazawa  
Medical Centre

Teruyasu Sugano, Department of Medical Science and Cardiorenal Medicine,  
Yokohama City University Graduate School of Medicine

Ichizo Tsujino, Internal Medicine I, Hokkaido University Hospital

Koichiro Yoshioka, Department of Cardiology, Tokai University School of Medicine

Nobuhiro Tanabe, Chibaken Saiseikai Narashino Hospital, and Department of  
Respirology, Graduate School of Medicine, Chiba University

Koichiro Tatsumi, Department of Respiriology, Graduated School of Medicine, Chiba  
University

Toshikazu Hashizume, Department of Cardiology, National Hospital Organization  
Minami Wakayama Medical Centre

Akiyoshi Hashimoto, Division of Health Care Administration and Management,  
Sapporo Medical University School of Medicine

Nobutaka Ikeda, Department of Cardiology, Toho University Medical Centre Ohashi  
Hospital

Takanori Ikeda, Department of Cardiovascular, Toho University Medical Centre Omori  
Hospital

Hidekazu Ikemiyagi, Department of Cardiovascular Medicine, Nephrology and  
Neurology, Graduate School of Medicine, University of the Ryukyus

Yasushi Imai, Department of Pharmacology, Jichi Medical University

Kouji Kajinami, Department of Cardiology, Kanazawa Medical University

Masa-aki Kawashiri, Department of Cardiovascular Medicine, Kanazawa University  
Graduate School of Medical Sciences

Yasuki Kihara, Hiroshima University, and Kobe City Medical Centre General Hospital

Hakuoh Konishi, Department of Cardiovascular Biology and Medicine, Juntendo  
University Graduate School of Medicine

Kayoko Kubota, Department of Cardiovascular Medicine and Hypertension, Graduate  
School of Medical and Dental Sciences, Kagoshima University

Toyoaki Murohara, Department of Cardiology, Nagoya University Graduate School of  
Medicine

Yoshito Ogihara, Department of Cardiology and Nephrology, Mie University Graduate  
of Medicine

Osamu Okazaki, Department of Cardiology, National Centre for Global Health and  
Medicine

Masataka Sata, Department of Cardiovascular Medicine, Tokushima University  
Graduate School of Biomedical Sciences

Toru Satoh, Department of Cardiovascular Medicine, Kyorin University

Toshiro Shinke, Division of Cardiology, Department of Medicine, Showa University  
School of Medicine

Kengo Suzuki, Division of Cardiology, Department of Internal Medicine, St. Marianna  
University School of Medicine

Nobuhiro Tahara, Division of Cardiovascular Medicine, Department of Medicine,  
Kurume University School of Medicine

Toru Takase, Division of Cardiology, Kindai University Faculty of Medicine

Yasuchika Takeishi, Department of Cardiovascular Medicine, Fukushima Medical  
University

Yuichi Tamura, Department of Cardiology, International University of Health and

Welfare School of Medicine

Yu Taniguchi, Department of Cardiology, Kobe University Graduate School of Medicine

Hiroshi Watanabe, Hamamatsu University School of Medicine

Eiichiro Yamamoto, Department of Cardiovascular Medicine, Kumamoto University Hospital

Jun Yamashita, Department of Cardiology, Tokyo Medical University Hospital

These affiliations are relevant to the time during which this study was conducted.

## **Inclusion and exclusion criteria**

### **[Inclusion criteria]**

Patients with chronic thromboembolic pulmonary hypertension (CTEPH) who provided written informed consent and met all of the following criteria:

- (1) Diagnosed with CTEPH and judged to meet any of a) to c) below by the investigator/subinvestigator based on at least two of the following tests: pulmonary ventilation/perfusion scan, pulmonary angiography, and chest contrast computed tomography (CT)
  - a) Unable to undergo pulmonary endarterectomy (PEA) due to organised thrombus localised in the peripheral region
  - b) Persistent or recurrent pulmonary hypertension (PH) after PEA without any sign of recurrent acute thromboembolism and reoperation not applicable
  - c) Unable to undergo PEA owing to high risks (e.g., concomitant disease and advanced age) or other reasons
- (2) PH of World Health Organisation functional class I–IV
- (3) Definitive diagnosis of PH based on right cardiac catheterisation according to criteria a) and b) below:
  - a) Mean resting pulmonary arterial pressure (mPAP)  $\geq 25$  mmHg
  - b) Pulmonary capillary wedge pressure or left ventricular end diastolic pressure  $\leq 15$  mmHg
- (4) Baseline pulmonary vascular resistance (PVR) higher than  $360 \text{ dyn} \cdot \text{s} \cdot \text{cm}^{-5}$  from right cardiac catheterisation in the period fulfilling all conditions a) to e) below:
  - a) Within 30 days before the start of the study treatment
  - b) At least 90 days after the end of the study treatment if any of the following drugs were administered:
    - Prostacyclin ( $\text{PGI}_2$ ) or any of its derivatives  
(However, acute treatment during catheterisation to examine the vascular reactivity of the study drug and temporary treatment within 3 days at least 7 days before right cardiac catheterisation were excluded. Beraprost sodium should be administered at least 7 days after the end of the study treatment.)
    - Drugs for the treatment of CTEPH other than endothelin receptor antagonists (ERAs), soluble guanylate cyclase (sGC) stimulators, and phosphodiesterase (PDE) 5 inhibitors  
(excluding background medications such as anticoagulants, diuretics, and calcium antagonists)
    - Other investigational drugs

- c) In patients receiving an ERA, sGC stimulator, PDE5 inhibitor, or calcium antagonist, at least 90 days had passed since the start of treatment at a fixed dose on consecutive days and after any short-term effect on the haemodynamics of these drugs had disappeared.
- d) At least 180 days after PEA if the patient had a history of PEA
- e) At least 90 days after balloon pulmonary angioplasty (BPA) in patients who underwent BPA
- (5) Anticoagulants administered at the effective dose specified in the package insert from at least 90 days before the date of right cardiac catheterisation (the date of baseline measurement) meeting criterion (4) above until the date of starting the study treatment.
- (6) Six-minute walk distance was  $\geq 150$  m on the date of providing informed consent
- (7) Aged  $\geq 20$  years and  $\leq 85$  years at the time of providing informed consent
- (8) Sex: Male or female  
However, patients had to consent to contraception and use reliable contraceptive methods during the study period. Women of childbearing potential had to have a negative pregnancy test prior to the study treatment. Women without childbearing potential included postmenopausal women (amenorrhoea for at least 1 year), sterile women, or women who had undergone sterilisation.
- (9) Japanese (Asian) ethnicity

[Exclusion criteria]

Patients who met any of the following criteria:

- (1) Severe obstructive pulmonary disease (forced expiratory volume in 1 second [FEV<sub>1</sub>]/forced vital capacity [FVC]  $< 0.6$ )
- (2) Severe restrictive pulmonary disease (total lung capacity [TLC]  $< 60\%$  of the predicted value)
- (3) Acute or chronic disorders (excluding dyspnoea) that may interfere with study requirements (especially the 6-minute walk test), such as angina pectoris and intermittent claudication
- (4) Developed acute symptomatic pulmonary embolism within 180 days before the study treatment
- (5) Consent could not be obtained owing to a mental disorder, dependency, dementia, or other diseases, or did not meet the requirements of the study
- (6) Human immunodeficiency virus with an opportunistic infection
- (7) Disease with life expectancy  $< 180$  days

- (8) Moderate or severe liver disorder (Child-Pugh classification class B or C [except a condition caused by treatment with anticoagulants])
- (9) Moderate or severe renal disorder (serum creatinine  $\geq 2.5$  mg/dL ([221  $\mu\text{mol/L}$ ])
- (10) Pregnant or lactating
- (11) Systolic blood pressure  $< 85$  mmHg before the study treatment
- (12) Met criteria a) to f) below in the period between the date of baseline measurement and the date of starting the study treatment
  - a) Received treatment with PGI<sub>2</sub> or any of its derivatives
  - b) History of treatment with drugs for CTEPH other than ERAs, sGC stimulators, and PDE5 inhibitors (excluding background medications such as anticoagulants, diuretics, and calcium antagonists)
  - c) Newly started treatment with an ERA, sGC stimulator, PDE5 inhibitor, or calcium antagonist, or not continued at a fixed dose on consecutive days.
  - d) Underwent PEA or BPA
  - e) Received clopidogrel
  - f) Received another investigational drug
- (13) History of hypersensitivity to any of the excipients of the product
- (14) Previous treatment with selexipag
- (15) Judged inappropriate for the study by the investigator (subinvestigator)

**Blinding**

The assignment was performed in a 1:1 ratio by minimisation, taking into account the presence or absence of the concomitant use of riociguat, disease classification, and PVR at baseline. It followed a procedure manual of dynamic allocation managed by an assignment manager. Treatment assignment was blinded. All participants, investigators, study staff, sponsors, and monitors remained blinded to the study treatment until the end of the study.

**Sensitivity analysis under alternative assumptions about the missing data**

For the primary efficacy variable PVR, the following two types of sensitivity analysis were performed as a post-hoc analysis.

- Multiple imputation assumed that the data are missing at random (MAR)
- Control-based imputation assumed that the data are missing not at random (MNAR)

In both cases, a regression method was used as the imputation method. The explanatory variables in the imputation model were treatment, presence/absence of concomitant riociguat, disease classification, and PVR at baseline. The number of imputations was 100. An ANCOVA analysis was performed, and the analysis model was the same as that used in the imputation model.



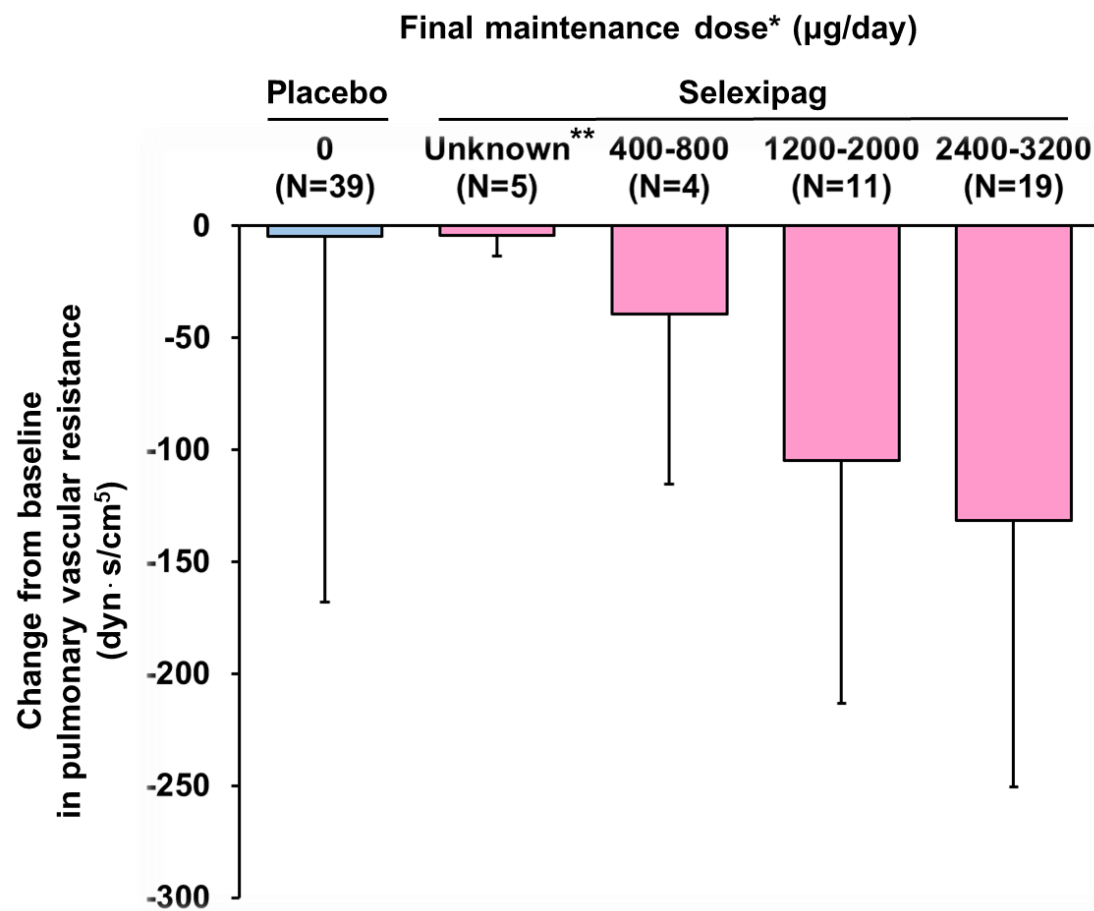

**Figure S1. Change in PVR from baseline by final maintenance dose.**

Data are presented as mean  $\pm$  standard deviation. The mean change from baseline was  $-4.6 \pm 163.6$  dyn·s·cm<sup>-5</sup> in the placebo group,  $-4.2 \pm 9.4$  dyn·s·cm<sup>-5</sup> in the group withdrawn by the start of the dose maintenance period,  $-39.5 \pm 75.6$  dyn·s·cm<sup>-5</sup> in the 400–800 µg/day group,  $-104.7 \pm 108.7$  dyn·s·cm<sup>-5</sup> in the 1,200–2,000 µg/day group, and  $-131.4 \pm 119.2$  dyn·s·cm<sup>-5</sup> in the 2,400–3,200 µg/day group. \* Dose prescribed at the start of the dose maintenance period. \*\* Subjects withdrawn by the start of the dose maintenance period. PVR, pulmonary vascular resistance

**Table S1. Randomised controlled trial data on the use of medical therapies in patients with chronic thromboembolic pulmonary hypertension.**

| Clinical Trial              | Medical Therapies | n   | Baseline of PVR<br>(dyn·s·cm <sup>-5</sup> ) | Baseline of mPAP<br>(mmHg) | Baseline of 6MWD<br>(m) |
|-----------------------------|-------------------|-----|----------------------------------------------|----------------------------|-------------------------|
| NS304C-P3-1<br>(this study) | Placebo           | 39  | 553.1 ± 184.0                                | 35.5 ± 8.3                 | 384.0 ± 87.0            |
|                             | Selexipag         | 39  | 523.4 ± 132.8                                | 35.2 ± 5.4                 | 407.9 ± 90.9            |
| CHEST-1                     | Placebo           | 82  | 779 ± 401                                    | -                          | -                       |
|                             | Riociguat         | 151 | 791 ± 432                                    | -                          | -                       |
|                             | Placebo           | 84  | -                                            | 44 ± 10                    | -                       |
|                             | Riociguat         | 156 | -                                            | 45 ± 13                    | -                       |
|                             | Placebo           | 88  | -                                            | -                          | 356 ± 75                |
|                             | Riociguat         | 173 | -                                            | -                          | 342 ± 82                |
| MERIT-1                     | Placebo           | 40  | 984 ± 487.1                                  | 51.7 ± 14.13               | 351.2 ± 73.79           |
|                             | Macitentan        | 40  | 929 ± 379.7                                  | 49.9 ± 11.73               | 353.0 ± 87.90           |
| BENEFiT                     | Placebo           | 80  | 787 ± 333                                    | 47.4 ± 12.5                | 344.5 ± 82.6            |
|                             | Bosentan          | 77  | 778 ± 323                                    | 44.2 ± 10.4                | 340.0 ± 85.3            |

Data are presented as mean ± SD.

PVR, pulmonary vascular resistance; 6MWD, 6-min walk distance; mPAP, mean pulmonary artery pressure

**Table S2. Sensitivity analysis of PVR.**

| Method                   | Estimate | SE   | 95% CI        |
|--------------------------|----------|------|---------------|
| Multiple imputation      | -84.3    | 28.6 | -140.4, -28.2 |
| Control-based imputation | -77.7    | 28.3 | -133.1, -22.2 |

Estimates of the difference between the selexipag and placebo for the change from baseline to week 20 in PVR.

PVR, pulmonary vascular resistance; SE, standard error; CI, confidence interval

**Table S3. Changes from baseline in SBP, DBP, and PR.**

| End Point         | Placebo                   |                           |                          | Selexipag                 |                           |                          |
|-------------------|---------------------------|---------------------------|--------------------------|---------------------------|---------------------------|--------------------------|
|                   | Baseline<br>(n = 39)      | Week 20<br>(n = 35)       | Change                   | Baseline<br>(n = 39)      | Week 20<br>(n = 34)       | Change                   |
| SBP<br>(mmHg)     | 116.1 ± 16.4<br>(89, 158) | 110.8 ± 14.0<br>(84, 138) | -4.8 ± 13.8<br>(-34, 34) | 112.5 ± 15.9<br>(92, 163) | 107.2 ± 13.5<br>(86, 140) | -4.9 ± 11.9<br>(-33, 15) |
| DBP<br>(mmHg)     | 66.1 ± 12.5<br>(43, 96)   | 66.5 ± 12.3<br>(47, 92)   | 0.7 ± 9.8<br>(-20, 28)   | 66.5 ± 12.4<br>(46, 103)  | 60.7 ± 11.1<br>(40, 88)   | -5.6 ± 8.0<br>(-19, 10)  |
| PR<br>(beats/min) | 75.2 ± 11.1<br>(53, 104)  | 74.9 ± 13.1<br>(40, 103)  | 0.4 ± 11.4<br>(-36, 25)  | 82.3 ± 14.3<br>(49, 107)  | 79.4 ± 12.0<br>(57, 109)  | -3.8 ± 17.3<br>(-46, 26) |

Data are presented as mean ± SD (range).

SBP, Systolic blood pressure; DBP, diastolic blood pressure; PR, pulse rate
