# Supplementary material
Source: HighWire-hosted journal article supplement (https://erj.ersjournals.com/content/60/1/2101694)
Supplement: inline-supplementary-material-2 [file inline-supplementary-material-2.pdf]

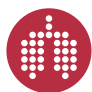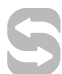

SHAREABLE PDF

# Selexipag for the treatment of chronic thromboembolic pulmonary hypertension

Takeshi Ogo<sup>1</sup>, Hiroto Shimokawahara<sup>2</sup>, Hideyuki Kinoshita<sup>3</sup>, Seiichiro Sakao<sup>4</sup>, Kohtaro Abe<sup>5</sup>, Satoaki Matoba<sup>6</sup>, Hirohiko Motoki<sup>7</sup>, Noriaki Takama<sup>8</sup>, Junya Ako<sup>9</sup>, Yasuhiro Ikeda<sup>10</sup>, Shuji Joho<sup>11</sup>, Hisataka Maki<sup>12</sup>, Takahiro Saeki<sup>13</sup>, Teruyasu Sugano<sup>14</sup>, Ichizo Tsujino<sup>15</sup>, Koichiro Yoshioka<sup>16</sup>, Naoki Shiota<sup>17</sup>, Shinichi Tanaka<sup>18</sup>, Chieko Yamamoto<sup>17</sup>, Nobuhiro Tanabe<sup>4,19</sup> and Koichiro Tatsumi<sup>4</sup>, for the Study Group<sup>20</sup>

<sup>1</sup>Division of Advanced Medical Research in Pulmonary Hypertension, Division of Pulmonary Circulation, Dept of Cardiovascular Medicine, National Cerebral and Cardiovascular Centre, Suita, Japan. <sup>2</sup>Dept of Cardiology, National Hospital Organization Okayama Medical Centre, Okayama, Japan. <sup>3</sup>Dept of Community Medicine Supporting System, Kyoto University Graduate School of Medicine, Kyoto, Japan. <sup>4</sup>Dept of Respiriology, Graduate School of Medicine, Chiba University, Chiba, Japan. <sup>5</sup>Dept of Cardiovascular Medicine, Kyushu University Graduate School of Medical Sciences, Fukuoka, Japan. <sup>6</sup>Dept of Cardiovascular Medicine, Graduate School of Medical Science, Kyoto Prefectural University of Medicine, Kyoto, Japan. <sup>7</sup>Dept of Cardiology, Shinshu University School of Medicine, Matsumoto, Japan. <sup>8</sup>Dept of Cardiovascular Medicine, Gunma University Graduate School of Medicine, Maebashi, Japan. <sup>9</sup>Dept of Cardiovascular Medicine, Kitasato University, Sagami, Japan. <sup>10</sup>Dept of Cardiology, Yamaguchi Prefectural Grand Medical Centre, Hofu, Japan. <sup>11</sup>Second Dept of Internal Medicine, University of Toyama, Toyama, Japan. <sup>12</sup>Dept of Cardiology, The University of Tokyo Hospital, Tokyo, Japan. <sup>13</sup>Cardiovascular Medicine, National Hospital Organization Kanazawa Medical Centre, Kanazawa, Japan. <sup>14</sup>Dept of Medical Science and Cardiorespiratory Medicine, Yokohama City University Graduate School of Medicine, Yokohama, Japan. <sup>15</sup>Internal Medicine I, Hokkaido University Hospital, Sapporo, Japan. <sup>16</sup>Dept of Cardiology, Tokai University School of Medicine, Isehara, Japan. <sup>17</sup>Clinical Development Dept, Nippon Shinyaku Co., Ltd, Kyoto, Japan. <sup>18</sup>Data Science Dept, Nippon Shinyaku Co., Ltd, Kyoto, Japan. <sup>19</sup>Chibaken Saiseikai Narashino Hospital, Narashino, Japan. <sup>20</sup>A list of study group members can be found in the supplementary material.

Corresponding author: Takeshi Ogo ([tak@ncvc.go.jp](mailto:tak@ncvc.go.jp))

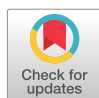

Shareable abstract (@ERSpublications)

**Selexipag significantly improved pulmonary vascular resistance and other haemodynamics in patients with chronic thromboembolic pulmonary hypertension, although exercise capacity remained unchanged** <https://bit.ly/3HfPA9s>

**Cite this article as:** Ogo T, Shimokawahara H, Kinoshita H, *et al.* Selexipag for the treatment of chronic thromboembolic pulmonary hypertension. *Eur Respir J* 2022; 60: 2101694 [DOI: 10.1183/13993003.01694-2021].

This single-page version can be shared freely online.

Copyright ©The authors 2022.

This version is distributed under the terms of the Creative Commons Attribution Non-Commercial Licence 4.0. For commercial reproduction rights and permissions contact [permissions@ersnet.org](mailto:permissions@ersnet.org)

This article has an editorial commentary:  
<https://doi.org/10.1183/13993003.00581-2022>

Received: 15 June 2021  
Accepted: 4 Nov 2021

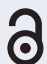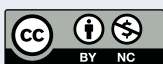

## Abstract

**Background** Treatment options for inoperable chronic thromboembolic pulmonary hypertension (CTEPH) remain limited. Selexipag, an oral selective IP prostacyclin receptor agonist approved for pulmonary arterial hypertension, is a potential treatment option for CTEPH.

**Methods** In this multicentre, randomised, double-blind, placebo-controlled study, 78 Japanese patients with inoperable CTEPH or persistent/recurrent pulmonary hypertension after pulmonary endarterectomy and/or balloon pulmonary angioplasty were randomly assigned to receive placebo or selexipag. The primary end-point was the change in pulmonary vascular resistance (PVR) from baseline to week 20. Secondary end-points were changes in other haemodynamic parameters: 6-min walk distance (6MWD), Borg dyspnoea scale score, World Health Organization (WHO) functional class, EuroQol five-dimension five-level tool and N-terminal pro-brain natriuretic peptide.

**Results** The change in PVR was  $-98.2 \pm 111.3 \text{ dyn} \cdot \text{s} \cdot \text{cm}^{-5}$  and  $-4.6 \pm 163.6 \text{ dyn} \cdot \text{s} \cdot \text{cm}^{-5}$  in the selexipag and placebo groups, respectively (mean difference  $-93.5 \text{ dyn} \cdot \text{s} \cdot \text{cm}^{-5}$ ; 95% CI  $-156.8$  to  $-30.3$ ;  $p=0.006$ ). The changes in cardiac index ( $p<0.001$ ) and Borg dyspnoea scale score ( $p=0.036$ ) were also significantly improved over placebo. 6MWD and WHO functional class were not significantly improved. The common adverse events in the selexipag group corresponded to those generally observed following administration of a prostacyclin analogue.

**Conclusion** Selexipag significantly improved PVR and other haemodynamic variables in patients with CTEPH, although exercise capacity remained unchanged. Further large-scale investigation is necessary to prove the role of selexipag in CTEPH.
